# Supplementary material for: The roles of formic acid and levulinic acid on the formation and growth of carbonaceous spheres by hydrothermal carbonization
Source: Royal Society of Chemistry journal article supplement (doi:10.1039/c6ra21312j), 2016-01-01
Supplement: c6ra21312j1.pdf [file c6ra21312j1.pdf]

# The roles of formic acid and levulinic acid on the formation and growth of carbonaceous spheres by hydrothermal carbonization

Yujie Qi<sup>a</sup>, Biying Song<sup>a</sup> and Yang Qi<sup>ab\*</sup>

<sup>a</sup> Department of Materials Physics and Chemistry, Northeastern University, Shenyang 110819, China.

<sup>b</sup> Key Laboratory for Anisotropy and Texture of Materials (MOE), Northeastern University, Shenyang 110819, China.

## Supporting Information

**Table S1.** Synthesis conditions and statistic results for carbonaceous spheres obtained from 0.100 M sucrose solutions.

| Sample | Time (h) | 100% Range         |              | 90% Range          |               | 50% Range          |               | Standard deviation (nm) |
|--------|----------|--------------------|--------------|--------------------|---------------|--------------------|---------------|-------------------------|
|        |          | Mean diameter (nm) | Range (nm)   | Mean diameter (nm) | Range (nm)    | Mean diameter (nm) | Range (nm)    |                         |
| A-1    | 3        | 162.72             | 47.49~817.35 | 159.09             | 96.42~244.06  | 156.08             | 125.35~190.25 | 54.07                   |
| A-2    | 3.25     | 139.93             | 73.81~324.11 | 138.78             | 98.69~186.01  | 138.17             | 121.18~154.95 | 27.40                   |
| A-3    | 3.5      | 189.70             | 93.3~475.86  | 188.18             | 140.42~249.86 | 185.63             | 166.88~209.85 | 35.38                   |
| A-4    | 3.75     | 138.19             | 75.11~251.97 | 137.55             | 104.82~182.05 | 136.75             | 123.59~149.71 | 22.82                   |
| A-5    | 4        | 192.72             | 74.61~400.05 | 190.55             | 145.48~259.40 | 186.11             | 169.86~208.21 | 38.70                   |

|     |     |        |               |        |               |        |               |       |
|-----|-----|--------|---------------|--------|---------------|--------|---------------|-------|
| A-6 | 4.5 | 192.31 | 89.07~329.50  | 191.47 | 142.56~250.70 | 191.26 | 173.05~209.27 | 31.58 |
| A-7 | 5   | 208.22 | 81.34~378.08  | 206.98 | 154.13~277.26 | 203.46 | 183.09~228.32 | 37.99 |
| A-8 | 5.5 | 287.99 | 139.47~499.13 | 287.36 | 211.60~366.45 | 287.95 | 260.08~314.43 | 46.09 |
| A-9 | 6   | 287.85 | 107.66~459.59 | 288.61 | 213.79~348.87 | 290.83 | 262.29~316.75 | 42.51 |

**Table S2.** Synthesis conditions and statistic results for carbonaceous spheres obtained from 0.100 M sucrose and 0.159 M formic acid mixed solutions.

| Sample | Time<br>(h) | 100% Range               |                | 90% Range                |                | 50% Range                |                 | Standard<br>deviation<br>(nm) |
|--------|-------------|--------------------------|----------------|--------------------------|----------------|--------------------------|-----------------|-------------------------------|
|        |             | Mean<br>diameter<br>(nm) | Range (nm)     | Mean<br>diameter<br>(nm) | Range (nm)     | Mean<br>diameter<br>(nm) | Range (nm)      |                               |
|        |             |                          |                |                          |                |                          |                 |                               |
| B-1    | 3           | 535.14                   | 190.92~691.77  | 536.37                   | 481.21~580.35  | 537.773                  | 518.55~554.49   | 31.05                         |
| B-2    | 3.25        | 619.18                   | 202.87~741.06  | 620.89                   | 550.99~673.63  | 622.56                   | 600.04~645.07   | 37.70                         |
| B-3    | 3.5         | 724.31                   | 557.47~936.85  | 724.50                   | 653.95~797.46  | 723.30                   | 695.74~751.79   | 46.47                         |
| B-4    | 3.75        | 516.21                   | 332.19~681.73  | 518.05                   | 449.95~570.30  | 519.69                   | 496.21~541.56   | 39.10                         |
| B-5    | 4           | 602.43                   | 52.27~900.89   | 607.60                   | 522.44~672.01  | 610.06                   | 582.28~632.23   | 58.96                         |
| B-6    | 4.5         | 775.90                   | 543.17~2207.31 | 775.20                   | 680.68~853.36  | 777.37                   | 745.94~806.78   | 72.22                         |
| B-7    | 5           | 906.14                   | 651.50~1089.79 | 907.85                   | 823.68~978.08  | 909.04                   | 879.38~936.50   | 49.91                         |
| B-8    | 5.5         | 1037.65                  | 620.03~2677.35 | 1027.42                  | 900.32~1168.57 | 1023.22                  | 975.77~1079.85  | 146.17                        |
| B-9    | 6           | 1120.63                  | 757.84~1646.71 | 1117.73                  | 992.38~1269.51 | 1115.74                  | 1067.66~1162.24 | 88.56                         |

**Table S3.** Synthesis conditions and statistic results for carbonaceous spheres obtained from 0.100 M sucrose and 0.100 M levulinic acid mixed solutions.

| Sample | Time<br>(h) | 100% Range               |               | 90% Range                |               | 50% Range                |               | Standard<br>deviation<br>(nm) |
|--------|-------------|--------------------------|---------------|--------------------------|---------------|--------------------------|---------------|-------------------------------|
|        |             | Mean<br>diameter<br>(nm) | Range (nm)    | Mean<br>diameter<br>(nm) | Range (nm)    | Mean<br>diameter<br>(nm) | Range (nm)    |                               |
| C-1    | 3           | 182.19                   | 118.72~332.41 | 181.18                   | 148.17~216.37 | 180.98                   | 167.92~194.72 | 23.43                         |
| C-2    | 3.25        | 178.96                   | 64.98~335.23  | 178.77                   | 135.16~221.72 | 178.63                   | 161.74~197.13 | 28.27                         |
| C-3    | 3.5         | 222.15                   | 74.22~337.65  | 222.90                   | 167.43~270.13 | 223.54                   | 202.40~244.55 | 32.35                         |
| C-4    | 3.75        | 249.50                   | 121.33~368.88 | 249.88                   | 194.61~299.87 | 251.28                   | 228.72~271.49 | 32.69                         |
| C-5    | 4           | 234.51                   | 91.98~418.92  | 234.82                   | 164.45~290.12 | 237.23                   | 211.73~260.13 | 40.39                         |
| C-6    | 4.5         | 223.57                   | 135.64~420.39 | 222.85                   | 165.95~282.95 | 222.27                   | 200.96~244.60 | 35.42                         |
| C-7    | 5           | 252.04                   | 102.01~439.12 | 251.67                   | 188.32~317.27 | 251.15                   | 225.05~278.59 | 39.62                         |
| C-8    | 5.5         | 354.71                   | 209.00~650.83 | 355.41                   | 284.15~415.67 | 357.57                   | 327.77~382.85 | 41.85                         |
| C-9    | 6           | 464.52                   | 176.89~581.95 | 468.47                   | 348.59~546.46 | 473.34                   | 434.01~506.76 | 60.81                         |

**Table S4.** Synthesis conditions and statistic results for carbonaceous spheres obtained from 0.100 M sucrose, 0.050 M formic acid and 0.100 M levulinic acid mixed solutions.

| Sample | Time<br>(h) | 100% Range               |                | 90% Range                |                | 50% Range                |                | Standard<br>deviation<br>(nm) |
|--------|-------------|--------------------------|----------------|--------------------------|----------------|--------------------------|----------------|-------------------------------|
|        |             | Mean<br>diameter<br>(nm) | Range (nm)     | Mean<br>diameter<br>(nm) | Range (nm)     | Mean<br>diameter<br>(nm) | Range (nm)     |                               |
|        |             | D-1                      | 3              | 252.82                   | 132.42~429.59  | 253.85                   | 191.23~298.41  |                               |
| D-2    | 3.25        | 461.31                   | 201.38~683.24  | 463.19                   | 382.79~516.53  | 465.44                   | 439.50~489.10  | 41.98                         |
| D-3    | 3.5         | 383.47                   | 198.55~512.51  | 384.87                   | 317.37~438.66  | 386.82                   | 360.65~408.63  | 37.75                         |
| D-4    | 3.75        | 460.09                   | 263.50~582.14  | 461.65                   | 388.24~511.39  | 463.89                   | 438.83~488.54  | 38.71                         |
| D-5    | 4           | 441.75                   | 190.61~605.86  | 442.86                   | 376.90~498.10  | 444.15                   | 420.39~466.15  | 37.40                         |
| D-6    | 4.5         | 524.37                   | 257.71~665.96  | 526.71                   | 434.85~589.09  | 530.19                   | 499.83~557.60  | 48.49                         |
| D-7    | 5           | 794.98                   | 527.34~995.57  | 797.13                   | 680.82~887.27  | 800.67                   | 758.40~833.71  | 62.30                         |
| D-8    | 5.5         | 965.25                   | 554.59~1480.96 | 967.29                   | 857.71~1045.46 | 969.99                   | 934.86~1002.22 | 59.88                         |
| D-9    | 6           | 885.35                   | 575.57~1917.08 | 884.97                   | 749.87~1013.60 | 885.83                   | 828.46~938.24  | 89.35                         |

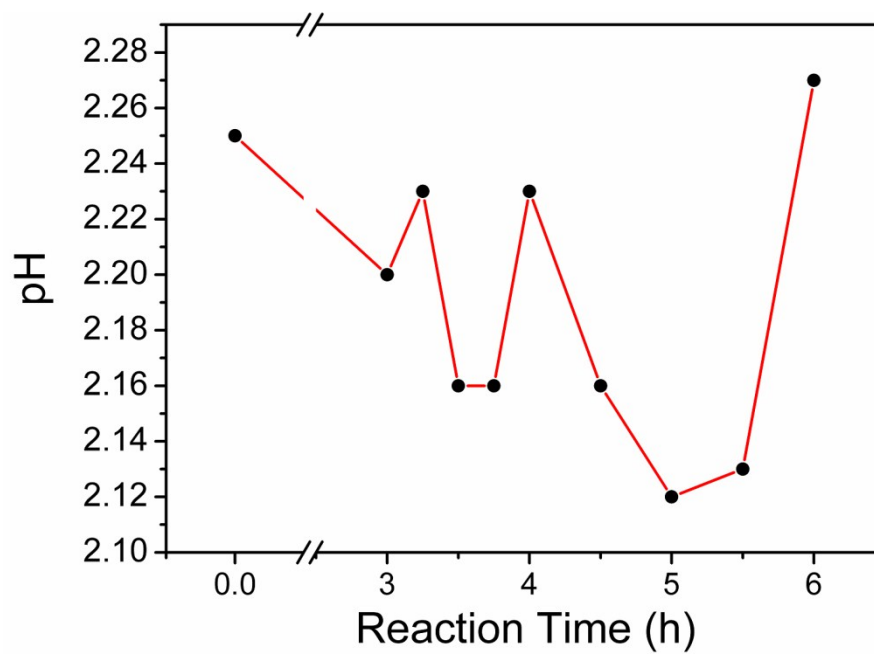

**Figure S1.** The variation of pH values of solutions from the adding formic acid system under different reaction time.
